# Supplementary material for: Effects of repeated blocks of split-belt walking on locomotor adaptation, physiological arousal response and cortical activation
Source: Research Square preprint supplement (doi:10.21203/rs.3.rs-7670653/v1), 2025-10-14
Supplement: Supplementary file 1 [file 3cc7e15d207aafffd912532a.docx]

***Supplementary Information***

**Effect of repeated blocks of split-belt walking on locomotor adaptation, physiological arousal response and cortical activation**

Kaya Yoshida1,2, Shannon B. Lim2, Lara A. Boyd1,4, Janice J. Eng2,3, Amy Schneeberg2, Theodore J. Huppert5, Courtney L. Pollock2,3

1Graduate Studies in Rehabilitation Sciences, University of British Columbia, Vancouver, Canada,

2Rehabilitation Research Program of the Centre for Aging SMART and the GF Strong Rehabilitation Centre, Vancouver, Canada

3Department of Physical Therapy, University of British Columbia, Vancouver, Canada

4The Djavad Mowafaghian Centre for Brain Health Vancouver, Canada

5Department of Electrical and Computer Engineering, University of Pittsburgh, Pittsburgh, PA, USA

Corresponding author: Courtney Pollock, [courtney.pollock@ubc.ca](mailto:courtney.pollock@ubc.ca)


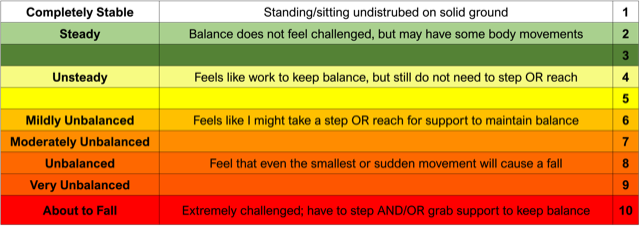


**Fig. S1** Rating of Perceived Stability (RPS) scale (Espy et al., 2017).


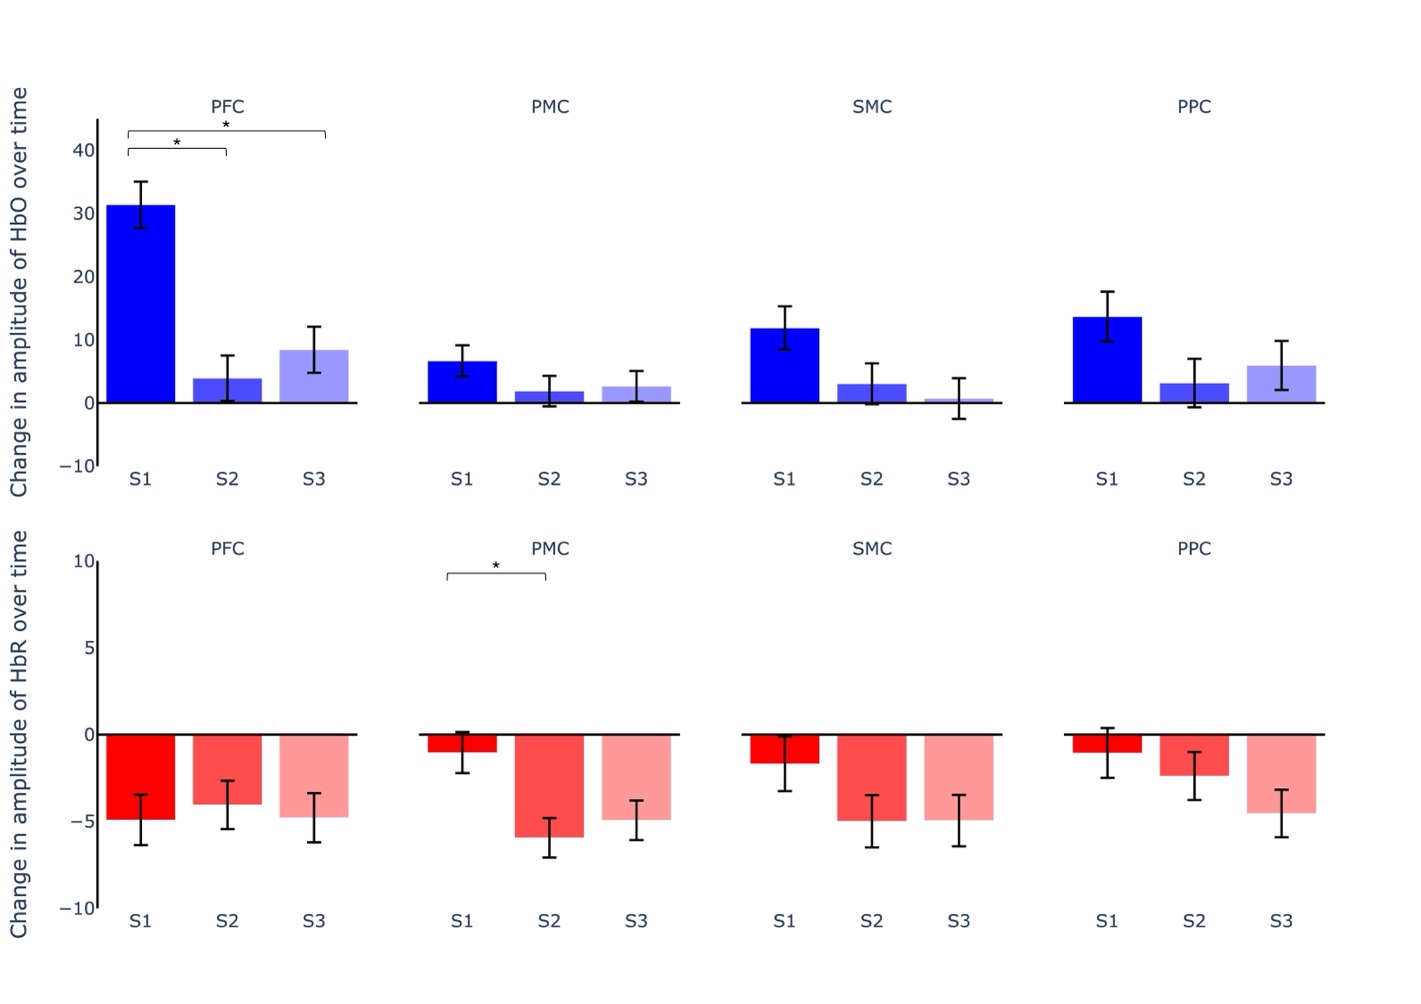


**Fig. S2** Bar graphs showing the change in amplitude of response over time in oxyhemoglobin (HbO) and deoxyhemoglobin (HbR) concentration across the three, 210-second split-belt walking blocks calculated for the prefrontal cortex (PFC), premotor cortex (PMC), sensorimotor cortex (SMC) and posterior parietal cortex (PPC) during split-blocks 1-3 (S1, S2, S3). Error bars represent the standard error. Asterisk (*) indicates significance at *q* ≤ 0.05


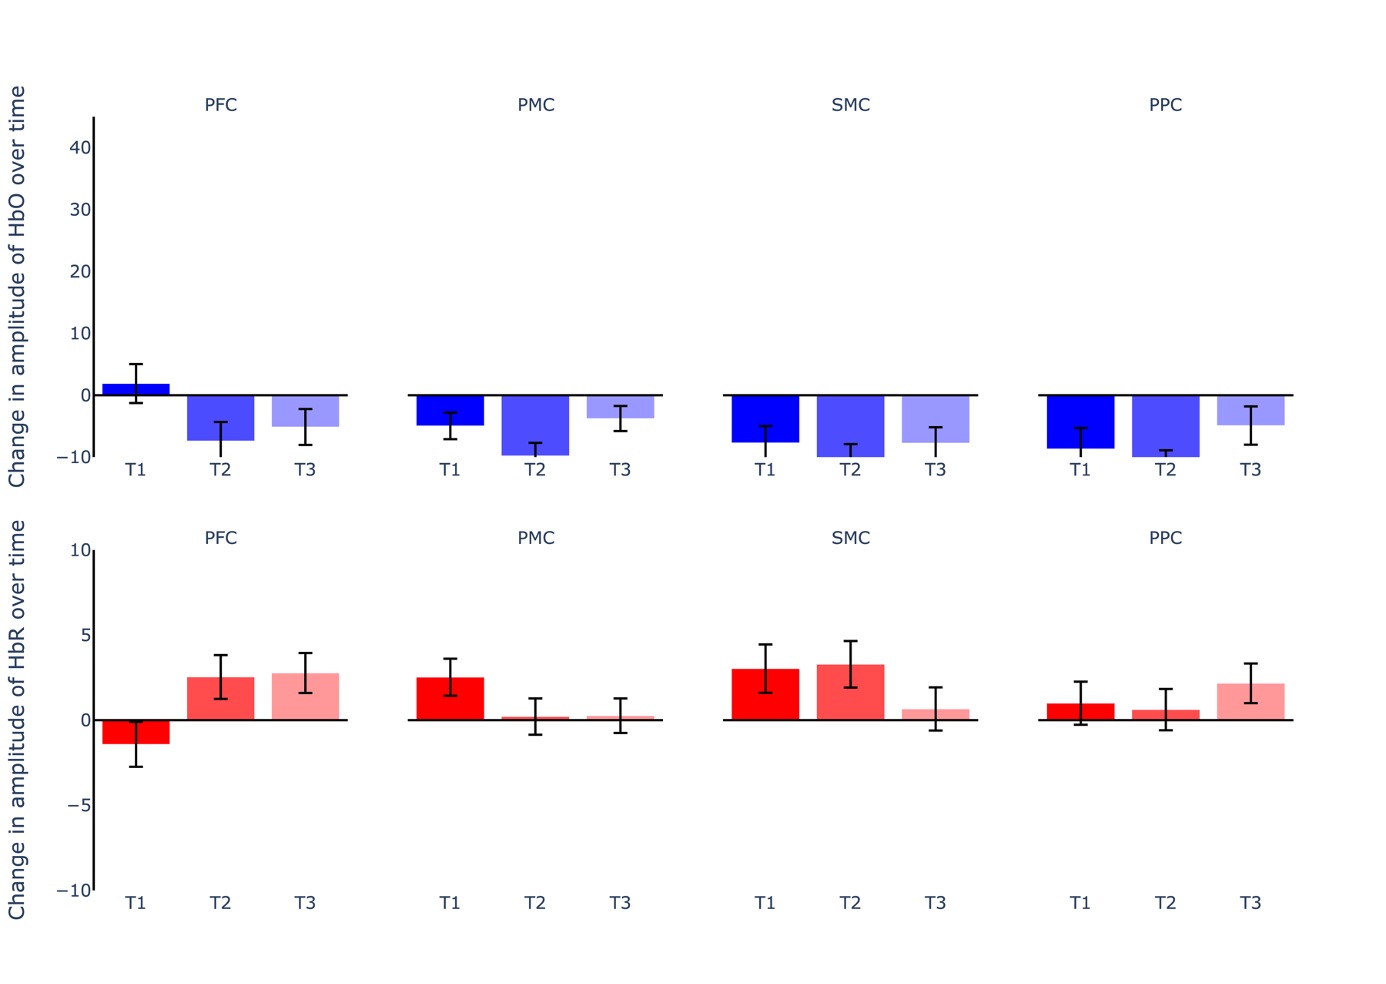


**Fig. S3** Bar graphs showing the mean amplitude of response in oxyhemoglobin (HbO) and deoxyhemoglobin (HbR) concentration across the three, 210-second tied-belt walking blocks calculated for the prefrontal cortex (PFC), premotor cortex (PMC), sensorimotor cortex (SMC) and posterior parietal cortex (PPC) during tied-blocks 1-3 (T1, T2, T3). Error bars represent the standard error


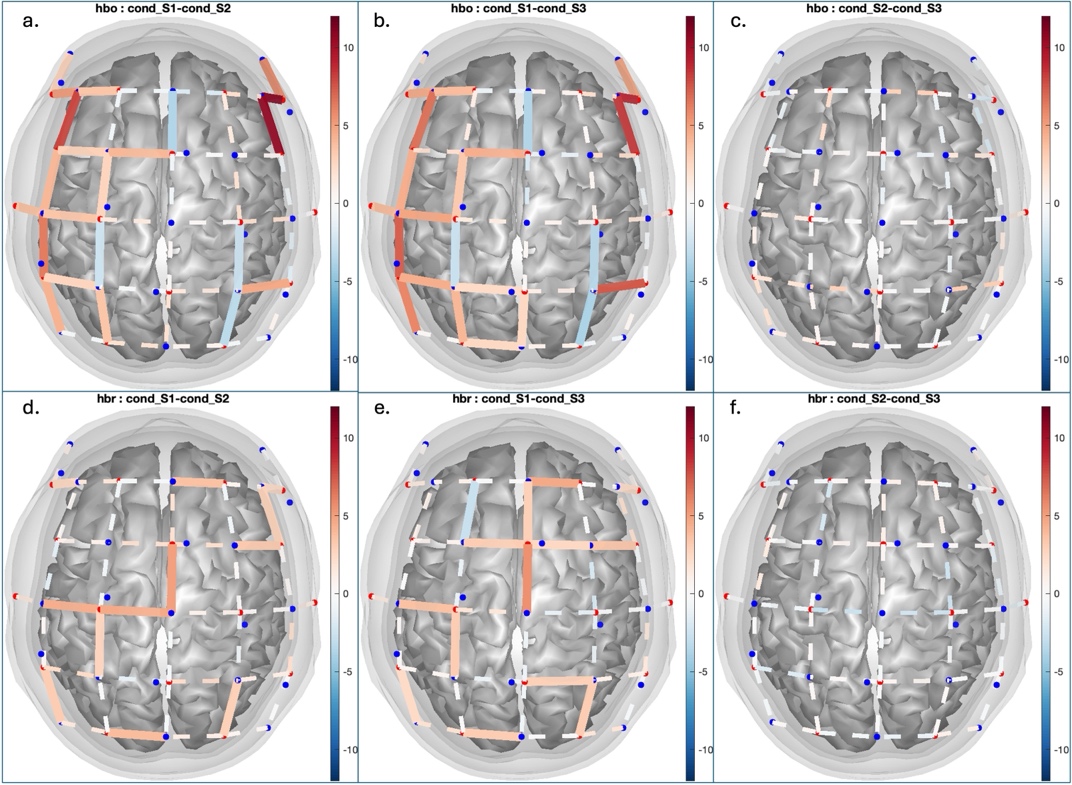


**Fig. S4** Block-wise activation maps by channel for comparisons between split blocks, averaged over the group, showing oxyhemoglobin (HbO, top) and deoxyhemoglobin (HbR, bottom). Results are displayed as t scores with a corrected threshold of q < 0.05

**
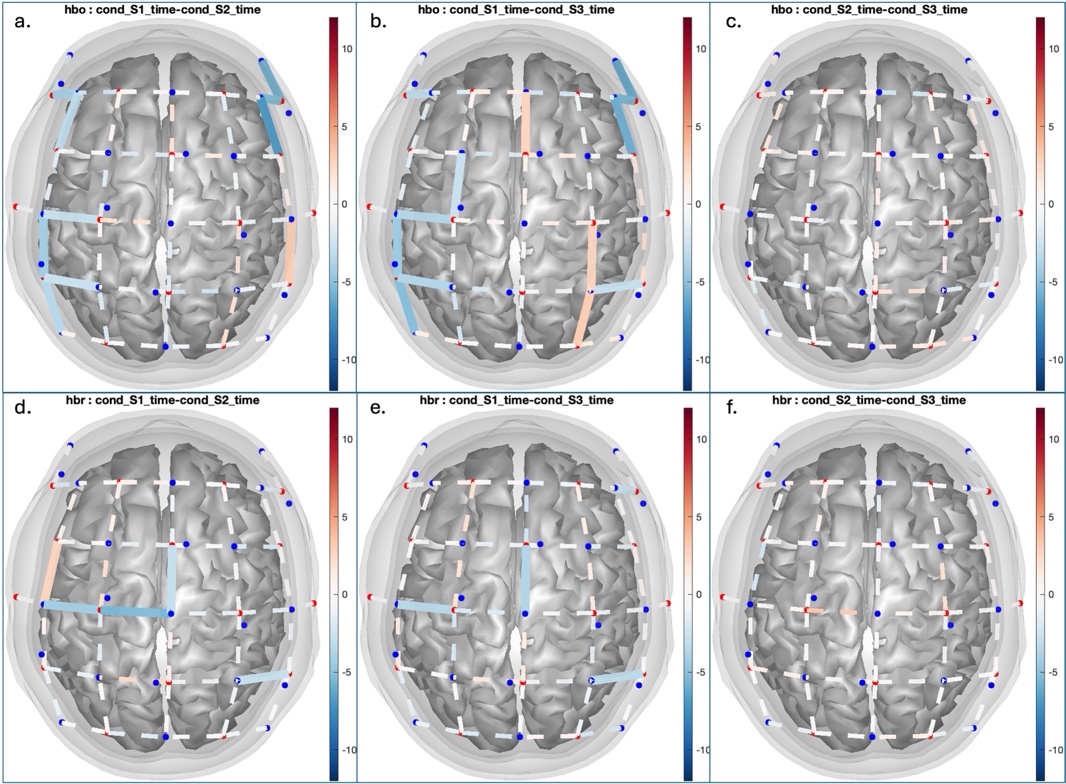
**

**Fig. S5** Time-varying activation maps by channel for comparisons between split blocks, averaged over the group, showing oxyhemoglobin (HbO, top) and deoxyhemoglobin (HbR, bottom). Results are displayed as t scores with a corrected threshold of q < 0.05


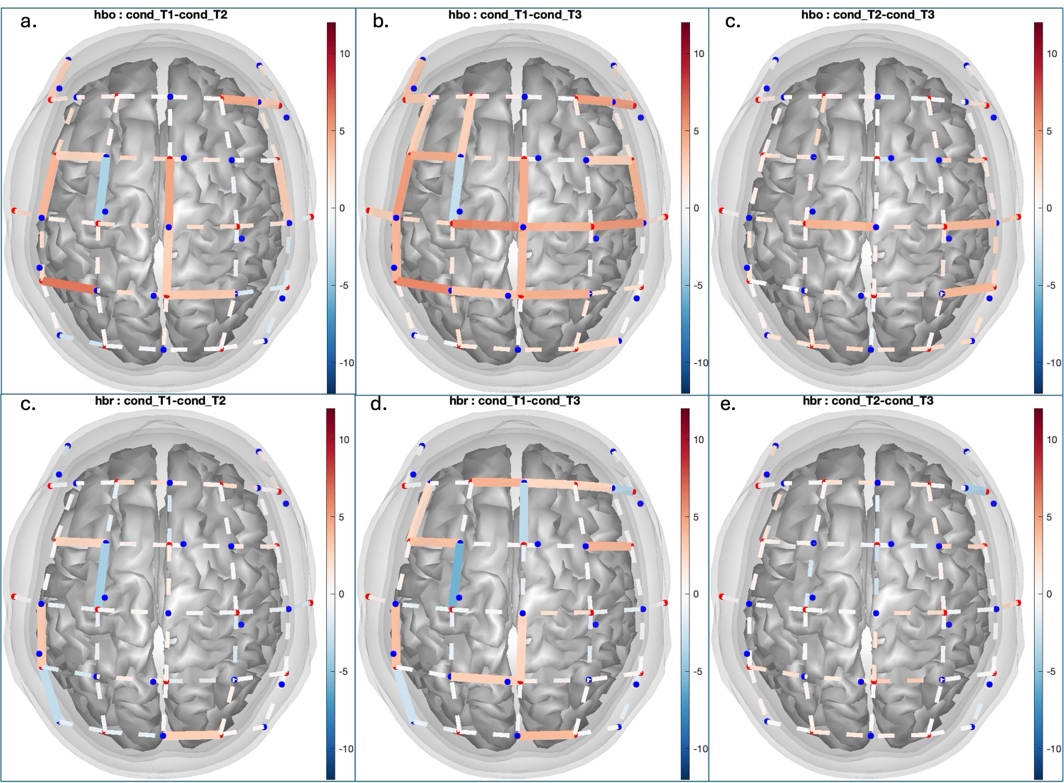


**Fig. S6** Block-wise activation maps by channel for comparisons between tied blocks, averaged over the group, showing oxyhemoglobin (HbO, top) and deoxyhemoglobin (HbR, bottom). Results are displayed as t scores with a corrected threshold of q < 0.05

**
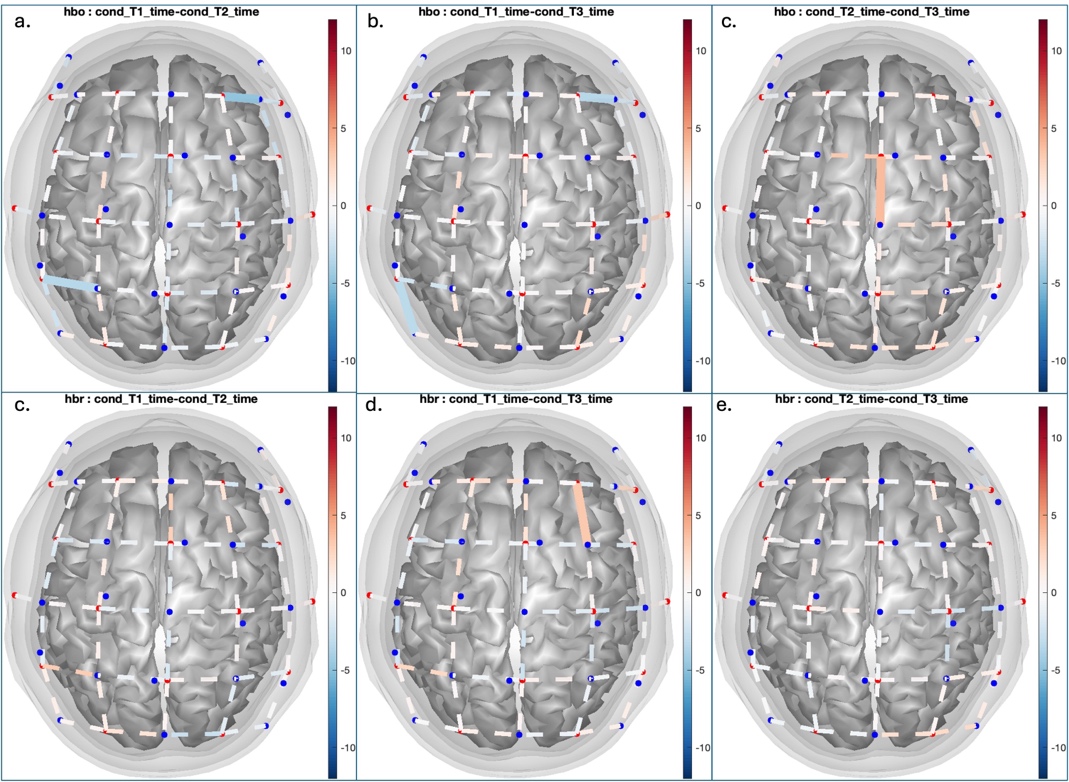
**

**Fig. S7** Time-varying activation maps by channel for comparisons between tied blocks, averaged over the group, showing oxyhemoglobin (HbO, top) and deoxyhemoglobin (HbR, bottom). Results are displayed as t scores with a corrected threshold of q < 0.05

**Table S1** Linear mixed-effects models results for all SLS and EDA

| **Variable** | **Predictors** | **Estimates** | **CI** | **p** | **σ2** | **τ00 PID** | **ICC** | **N PID** | **Observations** | **Marginal R2 / Conditional R2** |
| --- | --- | --- | --- | --- | --- | --- | --- | --- | --- | --- |
| RPS Split | Block [1] | 6.2 | 5.48 – 6.92 | **<0.001** | 0.72 | 2.32 | 0.76 | 20 | 120 | 0.274 / 0.828 |
|  | Block [2] | 4.7 | 3.98 – 5.42 | **<0.001** |  |  |  |  |  |  |
|  | Block [3] | 3.6 | 2.88 – 4.32 | **<0.001** |  |  |  |  |  |  |
| SLS Split | Phase [1] | -0.22 | -0.25 – -0.19 | **<0.001** | 0 | 0 | 0.67 | 20 | 120 | 0.441/0.815 |
|  | Phase [2] | -0.09 | -0.12 – -0.06 | **<0.001** |  |  |  |  |  |  |
|  | Block [2] | 0.12 | 0.10 – 0.14 | **<0.001** |  |  |  |  |  |  |
|  | Block [3] | 0.15 | 0.13 – 0.18 | **<0.001** |  |  |  |  |  |  |
|  | Phase [2] × Block [2] | -0.09 | -0.13 – -0.06 | **<0.001** |  |  |  |  |  |  |
|  | Phase [2] × Block [3] | -0.11 | -0.15 – -0.08 | **<0.001** |  |  |  |  |  |  |
| EDA Split | Phase [1] | 69.93 | 61.89 – 77.97 | **<0.001** | 152.8 | 159.65 | 0.51 | 19 | 114 | 0.454 / 0.733 |
|  | Phase [2] | 22.22 | 14.18 – 30.26 | **<0.001** |  |  |  |  |  |  |
|  | Block [2] | -32.95 | -40.90 – -25.00 | **<0.001** |  |  |  |  |  |  |
|  | Block [3] | -35.84 | -43.80 – -27.89 | **<0.001** |  |  |  |  |  |  |
|  | Phase [2] × Block [2] | 33.92 | 22.68 – 45.17 | **<0.001** |  |  |  |  |  |  |
|  | Phase [2] × Block [3] | 43.49 | 32.25 – 54.74 | **<0.001** |  |  |  |  |  |  |
| SLS Tied | Phase [1] | 0.12 | 0.10 – 0.14 | **<0.001** | 0 | 0 | 0.6 | 20 | 120 | 0.323/0.730 |
|  | Phase [2] | 0.03 | 0.01 – 0.05 | **0.002** |  |  |  |  |  |  |
|  | Block [2] | -0.04 | -0.06 – -0.02 | **<0.001** |  |  |  |  |  |  |
|  | Block [3] | -0.07 | -0.09 – -0.05 | **<0.001** |  |  |  |  |  |  |
|  | Phase [2] × Block [2] | 0.04 | 0.01 – 0.06 | **0.004** |  |  |  |  |  |  |
|  | Phase [2] × Block [3] | 0.07 | 0.05 – 0.10 | **<0.001** |  |  |  |  |  |  |
| EDA Tied | Phase [1] | 39.06 | 29.76 – 48.37 | **<0.001** | 173 | 245.34 | 0.59 | 19 | 114 | 0.238/0.685 |
|  | Phase [2] | 8.03 | -1.27 – 17.33 | 0.09 |  |  |  |  |  |  |
|  | Block [2] | -7.83 | -16.29 – 0.63 | 0.069 |  |  |  |  |  |  |
|  | Block [3] | -5.12 | -13.58 – 3.34 | 0.233 |  |  |  |  |  |  |
|  | Phase [2] × Block [2] | 12.76 | 0.80 – 24.73 | **0.037** |  |  |  |  |  |  |
|  | Phase [2] × Block [3] | 16.44 | 4.48 – 28.40 | **0.008** |  |  |  |  |  |  |

*uncorrected *p*-values and confidence intervals.

**Table S2** Functional near-infrared spectroscopy channels removed for each participant, shown as source-detector pairings. Channels were excluded if the scalp coupling index was below a threshold of 0.75. PFC = Prefrontal cortex; PPC = Posterior parietal cortex; PMC = Premotor cortex; SMC = Sensorimotor cortex.

| **Subject** | **PFC** | **PMC** | **SMC** | **PPC** |
| --- | --- | --- | --- | --- |
| P_01 | 2-3, 2-6, 3-3 | 6-9, 10-10 | 13-9 | 16-12 |
| P_02 | 2-6, 5-2, 7-4 | 7-10, 9-8 | 9-11, 12-11, 13-9, 14-10 | 12-13, 13-12, 15-11, 16-14 |
| P_03 | 3-7 | 5-8, 6-9, 9-8, 9-9, 10-9, 10-10, 11-10 | 9-11, 10-12, 12-11, 13-9, 14-10, 14-12 | 13-11, 13-12, 15-11, 16-12 |
| P_04 | All channels excluded due to technical issue | | | |
| P_05 | 4-5, 7-4 | 6-9, 7-7 | 9-11, 12-11 | 14-15, 15-11 |
| P_6 | NA | 9-8 | 14-Oct | 16-12 |
| P_7 | 2-3, 2-6 | 5-6, 6-9, 9-9 | NA | 15-11 |
| P_8 | NA | 6-6 | NA | NA |
| P_9 | NA | 6-9, 9-9, 10-9 | 13-9 | NA |
| P_10 | All channels excluded due to technical issue | | | |
| P_11 | 3-3, 5-2 | 5-6, 5-8, 6-7 | NA | NA |
| P_12 | 3-3, 3-7 | 9-9 | NA | NA |
| P_13 | 2-3, 3-3 | NA | NA | NA |
| P_14 | 3-3, 4-4, 4-5 | NA | 9-11, 12-11, 14-12 | 13-11, 15-11, 15-13, 16-12 |
| P_15 | 2-3, 2-6, 3-3 | 6-6, 9-6 | 12-11 | 12-13 |
| P_16 | NA | 6-9, 9-6, 10-7 | 13-9 | NA |
| P_17 | All channels excluded due to technical issue | | | |
| P_18 | 2-3, 3-3, 3-7 | 7-7, 9-6, 10-7, 10-10 | 12-11 | 13-12 |
| P_19 | 1-1, 2-3, 2-6 | NA | 13-9 | 13-14, 15-14 |
| P_20 | 3-7 | NA | 13-9 | NA |

**Table S3** Linear mixed effects model contrast results for step length symmetry (SLS), electrodermal arousal (EDA) and rating of perceived stability (RPS) during split and tied blocks for early and late phases. Estimated marginal means, standard error, corrected p-values (q-values) and Effect size (Cohen’s d)

| **Variable** | **Contrast** | **Estimate** | **Standard Error** | **q-value** | **Cohen's d** |
| --- | --- | --- | --- | --- | --- |
| SLS Split | Early Split1 - Late Split1 | -0.144 | 0.012 | **0.000** | -2.071 |
| Early Split1 - Early Split2 | -0.121 | 0.012 | **0.000** | -1.715 |
| Early Split1 - Late Split2 | -0.173 | 0.012 | **0.000** | -3.006 |
| Early Split1 - Early Split3 | -0.152 | 0.012 | **0.000** | -1.990 |
| Early Split1 - Late Split3 | -0.182 | 0.012 | **0.000** | -2.233 |
| Late Split1 - Early Split2 | 0.024 | 0.012 | 0.071 | -0.495 |
| Late Split1 - Late Split2 | -0.028 | 0.012 | **0.032** | -0.841 |
| Late Split1 - Early Split3 | -0.008 | 0.012 | 0.525 | 0.206 |
| Late Split1 - Late Split3 | -0.038 | 0.012 | **0.005** | -0.714 |
| Early Split2 - Late Split2 | -0.052 | 0.012 | **0.000** | -1.215 |
| Early Split2 - Early Split3 | -0.031 | 0.012 | **0.020** | -0.831 |
| Early Split2 - Late Split3 | -0.061 | 0.012 | **0.000** | -0.988 |
| Late Split2 - Early Split3 | 0.020 | 0.012 | 0.113 | -0.595 |
| Late Split2 - Late Split3 | -0.009 | 0.012 | 0.471 | -0.219 |
| Early Split3 - Late Split3 | -0.030 | 0.012 | **0.024** | -0.754 |
| EDA Split | Early Split1 - Late Split1 | 47.338 | 3.937 | **0.000** | 2.665 |
| Early Split1 - Early Split2 | 32.948 | 3.974 | **0.000** | 1.902 |
| Early Split1 - Late Split2 | 46.411 | 3.937 | **0.000** | 2.112 |
| Early Split1 - Early Split3 | 35.845 | 3.974 | **0.000** | 1.790 |
| Early Split1 - Late Split3 | 40.074 | 3.937 | **0.000** | 1.756 |
| Late Split1 - Early Split2 | -14.390 | 3.937 | **0.001** | 0.759 |
| Late Split1 - Late Split2 | -0.927 | 3.873 | 0.811 | -0.066 |
| Late Split1 - Early Split3 | -11.493 | 3.937 | **0.008** | 0.590 |
| Late Split1 - Late Split3 | -7.265 | 3.873 | 0.096 | -0.436 |
| Early Split2 - Late Split2 | 13.463 | 3.937 | **0.002** | 0.797 |
| Early Split2 - Early Split3 | 2.897 | 3.974 | 0.501 | 0.222 |
| Early Split2 - Late Split3 | 7.125 | 3.937 | 0.100 | 0.367 |
| Late Split2 - Early Split3 | -10.566 | 3.937 | **0.014** | 0.835 |
| Late Split2 - Late Split3 | -6.338 | 3.873 | 0.131 | -0.736 |
| Early Split3 - Late Split3 | 4.229 | 3.937 | 0.330 | 0.311 |
| RPS Split | Split1 - Split2 | 0.085 | 0.009 | **0.000** | 1.308 |
| Split1 - Split3 | 0.039 | 0.009 | **0.000** | 1.560 |
| Split2 - Split3 | 0.086 | 0.009 | **0.000** | 0.909 |
| SLS Tied | Early Tied1 - Late Tied1 | 0.085 | 0.009 | **0.000** | 1.416 |
| Early Tied1 - Early Tied2 | 0.039 | 0.009 | **0.000** | 0.908 |
| Early Tied1 - Late Tied2 | 0.086 | 0.009 | **0.000** | 1.804 |
| Early Tied1 - Early Tied3 | 0.069 | 0.009 | **0.000** | 1.621 |
| Early Tied1 - Late Tied3 | 0.083 | 0.009 | **0.000** | 1.473 |
| Late Tied1 - Early Tied2 | -0.046 | 0.009 | **0.000** | 1.487 |
| Late Tied1 - Late Tied2 | 0.001 | 0.009 | 0.876 | 0.034 |
| Late Tied1 - Early Tied3 | -0.016 | 0.009 | 0.114 | 0.350 |
| Late Tied1 - Late Tied3 | -0.002 | 0.009 | 0.876 | -0.043 |
| Early Tied2 - Late Tied2 | 0.047 | 0.009 | **0.000** | 1.546 |
| Early Tied2 - Early Tied3 | 0.030 | 0.009 | **0.002** | 1.048 |
| Early Tied2 - Late Tied3 | 0.044 | 0.009 | **0.000** | 1.141 |
| Late Tied2 - Early Tied3 | -0.017 | 0.009 | 0.090 | 0.643 |
| Late Tied2 - Late Tied3 | -0.003 | 0.009 | 0.820 | -0.187 |
| Early Tied3 - Late Tied3 | 0.014 | 0.009 | 0.161 | 0.443 |
| EDA Tied | Early Tied1 - Late Tied1 | 30.506 | 4.194 | **0.000** | 1.826 |
| Early Tied1 - Early Tied2 | 7.829 | 4.232 | 0.092 | 0.552 |
| Early Tied1 - Late Tied2 | 25.819 | 4.194 | **0.000** | 1.054 |
| Early Tied1 - Early Tied3 | 5.117 | 4.232 | 0.265 | 0.250 |
| Early Tied1 - Late Tied3 | 19.750 | 4.194 | **0.000** | 0.816 |
| Late Tied1 - Early Tied2 | -22.677 | 4.194 | **0.000** | 1.810 |
| Late Tied1 - Late Tied2 | -4.687 | 4.124 | 0.277 | -0.246 |
| Late Tied1 - Early Tied3 | -25.389 | 4.194 | **0.000** | 1.338 |
| Late Tied1 - Late Tied3 | -10.756 | 4.124 | **0.016** | -0.450 |
| Early Tied2 - Late Tied2 | 17.990 | 4.194 | **0.000** | 1.171 |
| Early Tied2 - Early Tied3 | -2.712 | 4.232 | 0.523 | -0.247 |
| Early Tied2 - Late Tied3 | 11.921 | 4.194 | **0.009** | 0.715 |
| Late Tied2 - Early Tied3 | -20.702 | 4.194 | **0.000** | 1.157 |
| Late Tied2 - Late Tied3 | -6.069 | 4.124 | 0.181 | -0.313 |
| Early Tied3 - Late Tied3 | 14.633 | 4.194 | **0.001** | 1.031 |

**Table S4** Statistical summary of hemoglobin responses (HbO and HbR) across regions of interest (ROI) during split-belt walking blocks. Table includes contrast conditions, estimated beta coefficients, standard errors, test statistics (T), p-values, false discovery rate-adjusted q-values, statistical power, and corresponding effect sizes (Cohen’s d).

| **ROI** | **Species** | **Contrast** | **Beta** | **Standard error** | **T** | ***p-*value** | ***q-*value** | **Power** | **Cohen's *d*** |
| --- | --- | --- | --- | --- | --- | --- | --- | --- | --- |
| PFC | HbO | S1_time-S2_time | -20.506 | 5.405 | -3.794 | **0.000** | **0.002** | 0.018 | -0.736 |
| PFC | HbO | S1_time-S3_time | -14.104 | 5.430 | -2.597 | **0.011** | 0.052 | 0.176 | -0.335 |
| PFC | HbO | S2_time-S3_time | 12.759 | 5.387 | 2.369 | **0.020** | **0.032** | 0.241 | 0.361 |
| PMC | HbO | S1_time-S2_time | -4.771 | 3.441 | -1.387 | 0.169 | 0.225 | 0.608 | -0.339 |
| PMC | HbO | S1_time-S3_time | -4.011 | 3.472 | -1.155 | 0.251 | 0.251 | 0.693 | -0.162 |
| PMC | HbO | S2_time-S3_time | 4.537 | 3.441 | 1.319 | 0.190 | 0.218 | 0.634 | 0.323 |
| PPC | HbO | S1_time-S2_time | -10.503 | 5.497 | -1.911 | 0.059 | 0.126 | 0.402 | -0.634 |
| PPC | HbO | S1_time-S3_time | -7.719 | 5.536 | -1.394 | 0.166 | 0.190 | 0.605 | -0.549 |
| PPC | HbO | S2_time-S3_time | 9.111 | 5.470 | 1.666 | 0.099 | 0.132 | 0.498 | 0.227 |
| SMC | HbO | S1_time-S2_time | -8.836 | 4.701 | -1.879 | 0.063 | 0.126 | 0.414 | 0.049 |
| SMC | HbO | S1_time-S3_time | -11.165 | 4.699 | -2.376 | **0.019** | 0.052 | 0.238 | 0.107 |
| SMC | HbO | S2_time-S3_time | 3.758 | 4.618 | 0.814 | 0.418 | 0.418 | 0.801 | 0.110 |
| PFC | HbR | S1_time-S2_time | -0.413 | 2.178 | -0.190 | 0.850 | 0.850 | 0.928 | -0.192 |
| PFC | HbR | S1_time-S3_time | -3.047 | 2.178 | -1.399 | 0.165 | 0.190 | 0.603 | -0.371 |
| PFC | HbR | S2_time-S3_time | -11.468 | 2.156 | -5.320 | **0.000** | **0.000** | 0.000 | -0.228 |
| PMC | HbR | S1_time-S2_time | -4.901 | 1.628 | -3.010 | **0.003** | **0.013** | 0.090 | -0.087 |
| PMC | HbR | S1_time-S3_time | -3.895 | 1.631 | -2.388 | **0.019** | 0.052 | 0.235 | 0.073 |
| PMC | HbR | S2_time-S3_time | -10.869 | 1.615 | -6.731 | **0.000** | **0.000** | 0.000 | 0.200 |
| PPC | HbR | S1_time-S2_time | -1.329 | 1.982 | -0.671 | 0.504 | 0.576 | 0.838 | -0.186 |
| PPC | HbR | S1_time-S3_time | -3.486 | 1.980 | -1.761 | 0.081 | 0.163 | 0.460 | -0.058 |
| PPC | HbR | S2_time-S3_time | -6.926 | 1.949 | -3.554 | **0.001** | **0.001** | 0.031 | 0.131 |
| SMC | HbR | S1_time-S2_time | -3.303 | 2.154 | -1.533 | 0.128 | 0.206 | 0.551 | 0.368 |
| SMC | HbR | S1_time-S3_time | -3.263 | 2.142 | -1.524 | 0.131 | 0.190 | 0.555 | 0.287 |
| SMC | HbR | S2_time-S3_time | -9.940 | 2.116 | -4.698 | **0.000** | **0.000** | 0.002 | 0.014 |
| PFC | HbO | S1-S2 | 16.769 | 3.453 | 4.856 | **0.000** | **0.000** | 0.001 | 0.658 |
| PFC | HbO | S1-S3 | 15.585 | 3.501 | 4.452 | **0.000** | **0.000** | 0.003 | 0.649 |
| PFC | HbO | S2-S3 | 6.851 | 3.636 | 1.884 | 0.063 | 0.125 | 0.412 | 0.067 |
| PMC | HbO | S1-S2 | 9.862 | 2.227 | 4.427 | **0.000** | **0.000** | 0.003 | 0.328 |
| PMC | HbO | S1-S3 | 10.692 | 2.275 | 4.700 | **0.000** | **0.000** | 0.002 | 0.341 |
| PMC | HbO | S2-S3 | 1.829 | 2.287 | 0.800 | 0.426 | 0.426 | 0.804 | 0.112 |
| PPC | HbO | S1-S2 | 7.313 | 3.461 | 2.113 | **0.037** | **0.041** | 0.326 | 0.488 |
| PPC | HbO | S1-S3 | 10.805 | 3.487 | 3.099 | **0.003** | **0.003** | 0.077 | 0.558 |
| PPC | HbO | S2-S3 | 2.859 | 3.571 | 0.801 | 0.425 | 0.426 | 0.804 | 0.350 |
| SMC | HbO | S1-S2 | 6.416 | 3.096 | 2.072 | **0.041** | **0.041** | 0.341 | -0.119 |
| SMC | HbO | S1-S3 | 11.440 | 3.127 | 3.658 | **0.000** | **0.001** | 0.024 | 0.155 |
| SMC | HbO | S2-S3 | 3.449 | 2.990 | 1.154 | 0.251 | 0.335 | 0.694 | 0.758 |
| PFC | HbR | S1-S2 | 5.153 | 1.499 | 3.437 | **0.001** | **0.002** | 0.039 | 0.439 |
| PFC | HbR | S1-S3 | 5.511 | 1.516 | 3.636 | **0.000** | **0.001** | 0.026 | 0.621 |
| PFC | HbR | S2-S3 | 9.025 | 1.509 | 5.982 | **0.000** | **0.000** | 0.000 | 0.255 |
| PMC | HbR | S1-S2 | 5.847 | 1.082 | 5.405 | **0.000** | **0.000** | 0.000 | 0.216 |
| PMC | HbR | S1-S3 | 4.087 | 1.097 | 3.726 | **0.000** | **0.001** | 0.021 | 0.051 |
| PMC | HbR | S2-S3 | 6.429 | 1.094 | 5.876 | **0.000** | **0.000** | 0.000 | -0.160 |
| PPC | HbR | S1-S2 | 4.083 | 1.342 | 3.043 | **0.003** | **0.005** | 0.085 | 0.226 |
| PPC | HbR | S1-S3 | 3.950 | 1.353 | 2.920 | **0.004** | **0.005** | 0.106 | 0.192 |
| PPC | HbR | S2-S3 | 2.286 | 1.329 | 1.720 | 0.089 | 0.142 | 0.476 | -0.081 |
| SMC | HbR | S1-S2 | 3.738 | 1.454 | 2.571 | **0.012** | **0.016** | 0.183 | -0.001 |
| SMC | HbR | S1-S3 | 2.394 | 1.456 | 1.644 | 0.103 | 0.103 | 0.507 | -0.078 |
| SMC | HbR | S2-S3 | 6.227 | 1.457 | 4.273 | **0.000** | **0.000** | 0.005 | -0.107 |

**Table S5.** Statistical summary of hemoglobin responses (HbO and HbR) across regions of interest (ROI) during tied-belt walking blocks. Table includes contrast conditions, estimated beta coefficients, standard errors, test statistics (T), p-values, false discovery rate-adjusted q-values, statistical power, and corresponding effect sizes (Cohen’s d)

| ROI | Species | Contrast | Beta | SE | T | *p-*value | *q-*value | Power | Cohen's *d* |
| --- | --- | --- | --- | --- | --- | --- | --- | --- | --- |
| PFC | HbO | T1_time-T2_time | -9.268 | 4.280 | -2.166 | **0.033** | 0.131 | 0.308 | -0.037 |
| PFC | HbO | T1_time-T3_time | -7.012 | 4.194 | -1.672 | 0.098 | 0.329 | 0.496 | -0.097 |
| PFC | HbO | T2_time-T3_time | -12.508 | 4.300 | -2.909 | **0.005** | **0.007** | 0.108 | -0.072 |
| PMC | HbO | T1_time-T2_time | -4.840 | 2.917 | -1.659 | 0.100 | 0.246 | 0.501 | 0.251 |
| PMC | HbO | T1_time-T3_time | 1.180 | 2.887 | 0.409 | 0.684 | 0.781 | 0.893 | 0.359 |
| PMC | HbO | T2_time-T3_time | -13.550 | 2.988 | -4.535 | **0.000** | **0.000** | 0.003 | 0.005 |
| PPC | HbO | T1_time-T2_time | -3.518 | 4.575 | -0.769 | 0.444 | 0.592 | 0.813 | 0.051 |
| PPC | HbO | T1_time-T3_time | 3.760 | 4.472 | 0.841 | 0.403 | 0.644 | 0.793 | -0.004 |
| PPC | HbO | T2_time-T3_time | -17.079 | 4.625 | -3.693 | **0.000** | **0.001** | 0.023 | -0.052 |
| SMC | HbO | T1_time-T2_time | -2.843 | 3.640 | -0.781 | 0.437 | 0.592 | 0.810 | -0.242 |
| SMC | HbO | T1_time-T3_time | -0.039 | 3.619 | -0.011 | 0.991 | 0.991 | 0.949 | -0.391 |
| SMC | HbO | T2_time-T3_time | -18.264 | 3.826 | -4.773 | **0.000** | **0.000** | 0.001 | -0.005 |
| PFC | HbR | T1_time-T2_time | 3.955 | 1.775 | 2.229 | **0.028** | 0.131 | 0.286 | 0.149 |
| PFC | HbR | T1_time-T3_time | 4.191 | 1.713 | 2.446 | **0.016** | 0.130 | 0.217 | 0.000 |
| PFC | HbR | T2_time-T3_time | 5.311 | 1.803 | 2.945 | **0.004** | **0.007** | 0.101 | -0.135 |
| PMC | HbR | T1_time-T2_time | -2.309 | 1.485 | -1.555 | 0.123 | 0.246 | 0.542 | 0.456 |
| PMC | HbR | T1_time-T3_time | -2.259 | 1.454 | -1.554 | 0.123 | 0.329 | 0.543 | 0.417 |
| PMC | HbR | T2_time-T3_time | 0.478 | 1.512 | 0.316 | 0.752 | 0.752 | 0.909 | 0.023 |
| PPC | HbR | T1_time-T2_time | -0.377 | 1.713 | -0.220 | 0.827 | 0.895 | 0.924 | 0.046 |
| PPC | HbR | T1_time-T3_time | 1.169 | 1.683 | 0.695 | 0.489 | 0.652 | 0.832 | 0.178 |
| PPC | HbR | T2_time-T3_time | 2.786 | 1.727 | 1.614 | 0.110 | 0.126 | 0.519 | 0.149 |
| SMC | HbR | T1_time-T2_time | 0.255 | 1.920 | 0.133 | 0.895 | 0.895 | 0.935 | 0.117 |
| SMC | HbR | T1_time-T3_time | -2.369 | 1.859 | -1.274 | 0.206 | 0.412 | 0.650 | 0.166 |
| SMC | HbR | T2_time-T3_time | 3.944 | 1.920 | 2.054 | **0.043** | 0.057 | 0.348 | 0.074 |
| PFC | HbO | T1-T2 | 8.645 | 2.690 | 3.213 | **0.002** | **0.007** | 0.062 | 0.203 |
| PFC | HbO | T1-T3 | 12.201 | 2.702 | 4.516 | **0.000** | **0.000** | 0.003 | 0.329 |
| PFC | HbO | T2-T3 | -5.420 | 2.995 | -1.810 | 0.073 | 0.196 | 0.441 | 0.235 |
| PMC | HbO | T1-T2 | 6.801 | 1.846 | 3.684 | **0.000** | **0.003** | 0.023 | 0.176 |
| PMC | HbO | T1-T3 | 12.431 | 1.864 | 6.668 | **0.000** | **0.000** | 0.000 | 0.461 |
| PMC | HbO | T2-T3 | 8.212 | 2.066 | 3.975 | **0.000** | **0.001** | 0.011 | 0.498 |
| PPC | HbO | T1-T2 | 1.376 | 2.924 | 0.471 | 0.639 | 0.852 | 0.882 | 0.043 |
| PPC | HbO | T1-T3 | 9.178 | 2.953 | 3.108 | **0.002** | **0.005** | 0.076 | 0.648 |
| PPC | HbO | T2-T3 | -4.510 | 3.190 | -1.414 | 0.161 | 0.214 | 0.597 | 0.736 |
| SMC | HbO | T1-T2 | 7.108 | 2.314 | 3.071 | **0.003** | **0.007** | 0.081 | 0.396 |
| SMC | HbO | T1-T3 | 13.833 | 2.355 | 5.874 | **0.000** | **0.000** | 0.000 | 1.073 |
| SMC | HbO | T2-T3 | 7.635 | 2.627 | 2.906 | **0.005** | **0.018** | 0.108 | 0.731 |
| PFC | HbR | T1-T2 | -0.807 | 1.230 | -0.656 | 0.513 | 0.821 | 0.841 | 0.177 |
| PFC | HbR | T1-T3 | -0.241 | 1.209 | -0.199 | 0.843 | 0.901 | 0.926 | 0.257 |
| PFC | HbR | T2-T3 | -2.219 | 1.377 | -1.612 | 0.110 | 0.214 | 0.520 | 0.291 |
| PMC | HbR | T1-T2 | -0.094 | 0.943 | -0.100 | 0.921 | 0.921 | 0.939 | -0.298 |
| PMC | HbR | T1-T3 | 0.364 | 0.952 | 0.382 | 0.703 | 0.901 | 0.898 | -0.229 |
| PMC | HbR | T2-T3 | -1.596 | 1.075 | -1.484 | 0.141 | 0.214 | 0.570 | 0.071 |
| PPC | HbR | T1-T2 | -1.135 | 1.152 | -0.985 | 0.327 | 0.654 | 0.750 | -0.206 |
| PPC | HbR | T1-T3 | 0.144 | 1.158 | 0.125 | 0.901 | 0.901 | 0.936 | -0.106 |
| PPC | HbR | T2-T3 | -1.229 | 1.258 | -0.977 | 0.331 | 0.331 | 0.752 | 0.081 |
| SMC | HbR | T1-T2 | -0.386 | 1.258 | -0.307 | 0.760 | 0.868 | 0.911 | -0.268 |
| SMC | HbR | T1-T3 | 1.970 | 1.261 | 1.562 | 0.122 | 0.194 | 0.539 | -0.095 |
| SMC | HbR | T2-T3 | -1.522 | 1.389 | -1.095 | 0.276 | 0.316 | 0.714 | 0.248 |

**Table S6** All correlation results between variables. Including Pearson’s correlations (r) and Spearman’s rank correlations (𝜌). Bolded p- and q-values indicate significance at alpha < 0.05. SLS = step length symmetry, EDA = electrodermal activity, PFC = prefrontal cortex, PPC = posterior parietal cortex, PPC = Premotor cortex (which includes the supplementary motor area), SMC = sensorimotor cortex, RPS = Rating of perceived stability)

| Comparisons | Correlation coefficient | *p*-value | *q*-value |
| --- | --- | --- | --- |
| SLS Split, EDA Split | **-0.569** | **0.000** | **0.000** |
| SLS Split, PFC HbO Split | -0.270 | 0.056 | 0.272 |
| SLS Split, PMC HbO Split | -0.142 | 0.322 | 0.674 |
| SLS Split, SMC HbO Split | -0.254 | 0.073 | 0.290 |
| SLS Split, PPC HbO Split | -0.212 | 0.136 | 0.399 |
| EDA Split, PFC HbO Split | 0.236 | 0.106 | 0.389 |
| EDA Split, PMC HbO Split | 0.202 | 0.168 | 0.463 |
| EDA Split, SMC HbO Split | 0.122 | 0.409 | 0.692 |
| EDA Split, PPC HbO Split | 0.283 | 0.051 | 0.320 |
| SLS Split, PFC HbR Split | -0.125 | 0.384 | 0.676 |
| SLS Split, PMC HbR Split | -0.038 | 0.789 | 0.964 |
| SLS Split, SMC HbR Split | -0.102 | 0.477 | 0.749 |
| SLS Split, PPC HbR Split | -0.008 | 0.954 | 0.976 |
| EDA Split, PFC HbR Split | 0.167 | 0.256 | 0.626 |
| EDA Split, PMC HbR Split | 0.048 | 0.748 | 0.968 |
| EDA Split, SMC HbR Split | -0.019 | 0.899 | 0.989 |
| EDA Split, PPC HbR Split | 0.042 | 0.777 | 0.976 |
| EDA Tied, PFC HbO Tied | -0.136 | 0.358 | 0.656 |
| EDA Tied, PMC HbO Tied | -0.147 | 0.320 | 0.703 |
| EDA Tied, SMC HbO Tied | -0.281 | 0.053 | 0.294 |
| EDA Tied, PPC HbO Tied | **-0.306** | **0.034*** | 0.252 |
| EDA Tied, PFC HbR Tied | -0.142 | 0.336 | 0.672 |
| EDA Tied, PMC HbR Tied | -0.094 | 0.525 | 0.797 |
| EDA Tied, SMC HbR Tied | -0.002 | 0.991 | 0.991 |
| EDA Tied, PPC HbR Tied | -0.012 | 0.933 | 0.977 |
| RPS Split, PFC HbO Split | 0.183 | 0.200 | 0.517 |
| RPS Split, PMC HbO Split | -0.056 | 0.699 | 0.932 |
| RPS Split, SMC HbO Split | -0.228 | 0.107 | 0.364 |
| RPS Split, PPC HbO Split | 0.034 | 0.813 | 0.967 |
| RPS Split, SLS Split | -0.203 | 0.119 | 0.374 |
| RPS Split, EDA Split | **0.364** | **0.005*** | 0.118 |
| RPS Split, PFC HbR Split | **0.350** | **0.012*** | 0.129 |
| RPS Split, PMC HbR Split | 0.085 | 0.555 | 0.814 |
| RPS Split, SMC HbR Split | 0.114 | 0.426 | 0.694 |
| RPS Split, PPC HbR Split | **0.298** | **0.034*** | 0.296 |
| SLS Tied, EDA Tied | 0.025 | 0.852 | 0.905 |
| SLS Tied, PFC HbO Tied | 0.101 | 0.479 | 0.814 |
| SLS Tied, PMC HbO Tied | 0.039 | 0.787 | 1.000 |
| SLS Tied, SMC HbO Tied | 0.139 | 0.332 | 0.805 |
| SLS Tied, PPC HbO Tied | -0.037 | 0.796 | 0.966 |
| SLS Tied, PFC HbR Tied | 0.041 | 0.776 | 1.000 |
| SLS Tied, PMC HbR Tied | -0.244 | 0.085 | 0.479 |
| SLS Tied, SMC HbR Tied | 0.174 | 0.222 | 0.755 |
| SLS Tied, PPC HbR Tied | -0.034 | 0.813 | 0.921 |

Bold and * indicate significance at alpha < 0.05. Bolded correlation coefficients indicate relationships with strengths > |0.3|
